# Supplementary material
Source: Springer Nature journal article supplement (https://www.springermedizin.de/resource/supplementary/13012_2009_232_MOESM2_ESM.pdf/9629516)
Supplement: MOESM2 [file 9629516]

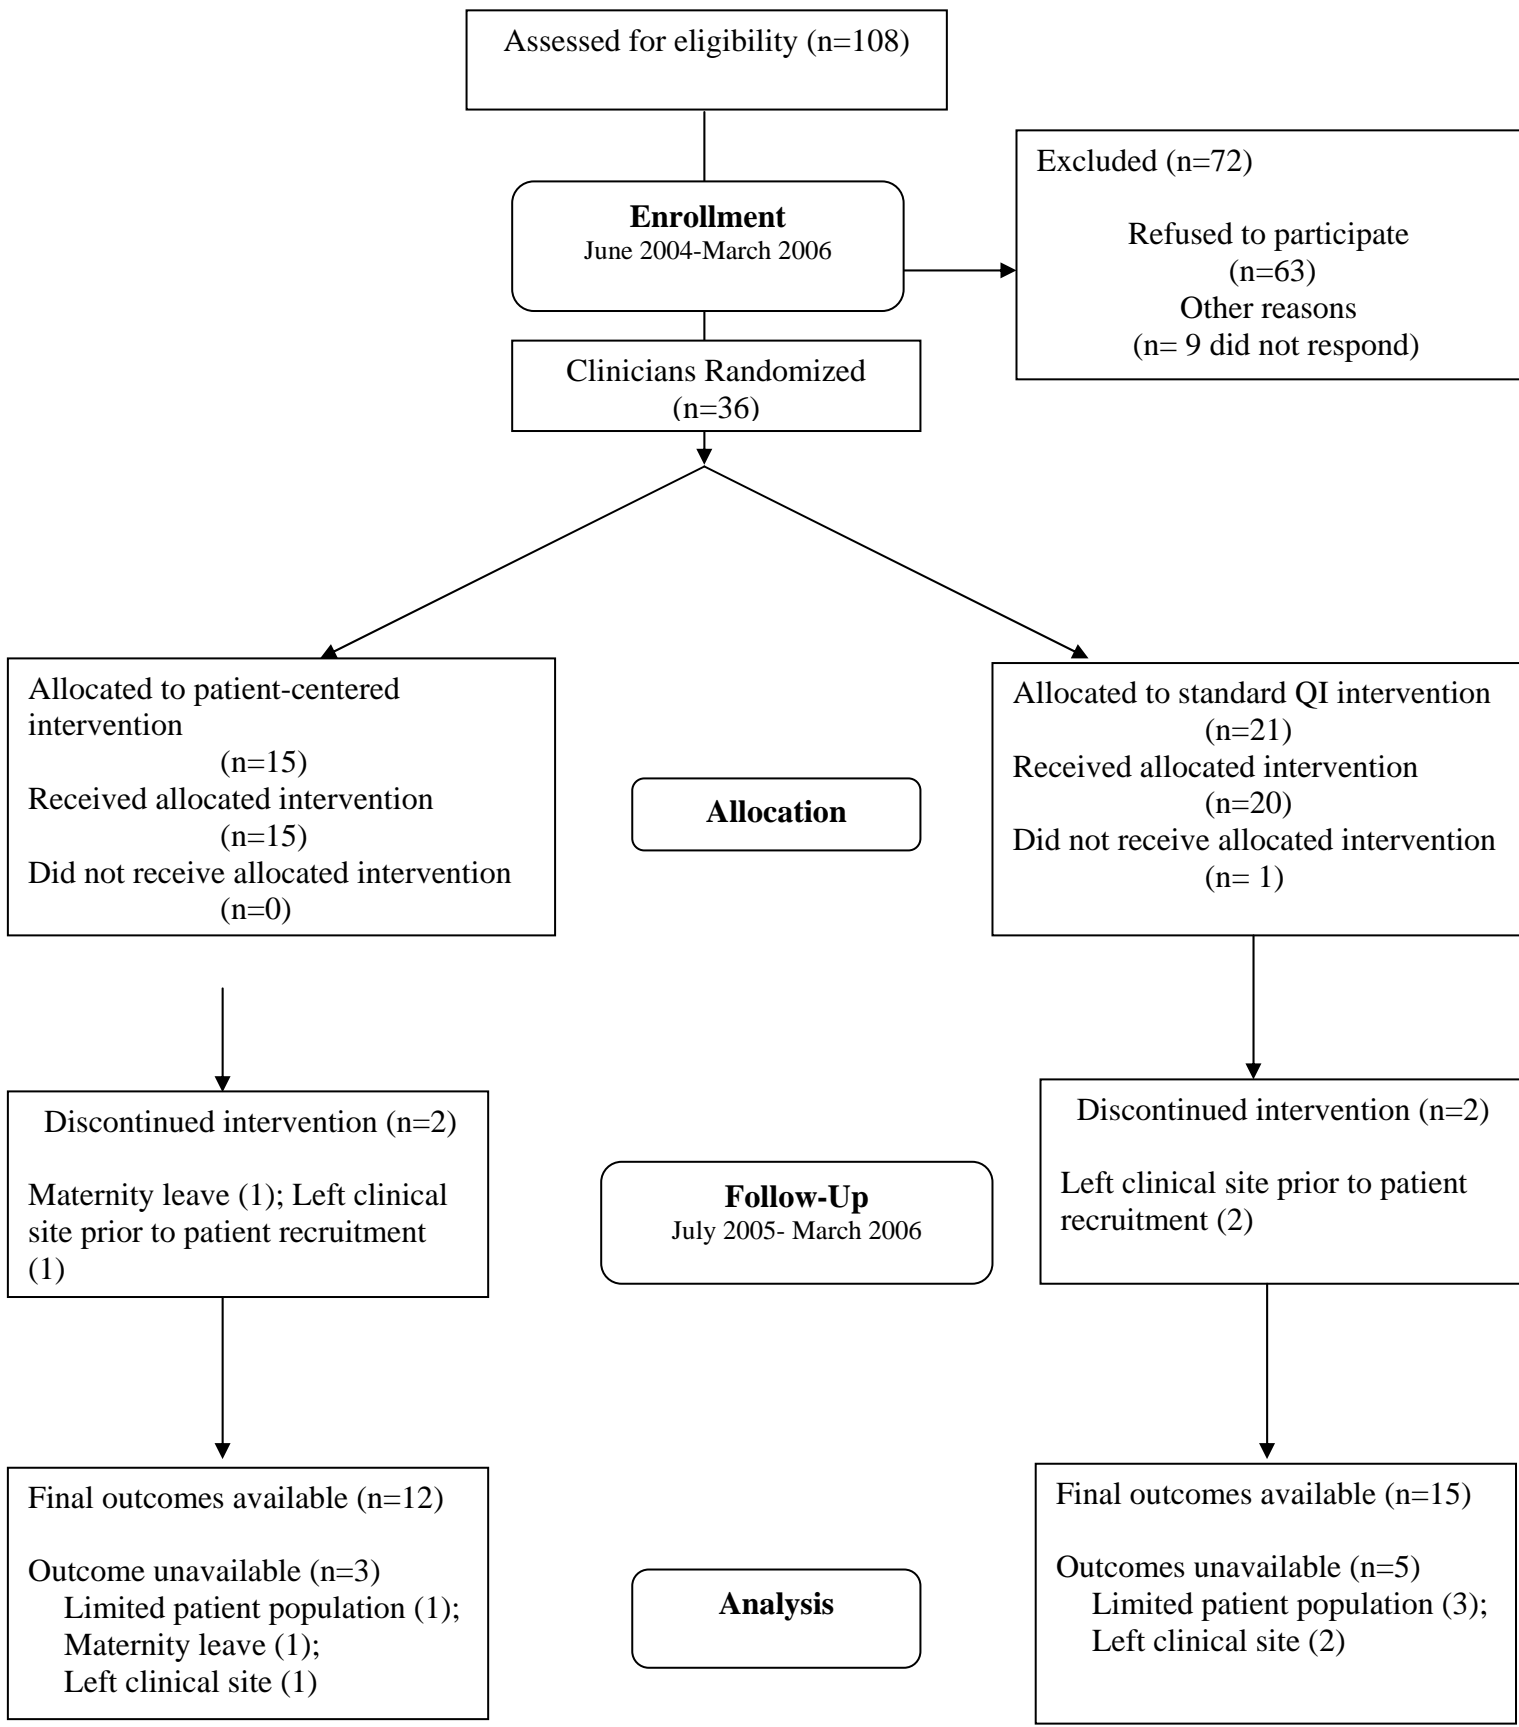

Assessed for eligibility (n=108)

**Enrollment**  
June 2004-March 2006

Excluded (n=72)  
Refused to participate (n=63)  
Other reasons (n= 9 did not respond)

Clinicians Randomized (n=36)

Allocated to patient-centered intervention (n=15)  
Received allocated intervention (n=15)  
Did not receive allocated intervention (n=0)

**Allocation**

Allocated to standard QI intervention (n=21)  
Received allocated intervention (n=20)  
Did not receive allocated intervention (n= 1)

Discontinued intervention (n=2)  
Maternity leave (1); Left clinical site prior to patient recruitment (1)

**Follow-Up**  
July 2005- March 2006

Discontinued intervention (n=2)  
Left clinical site prior to patient recruitment (2)

Final outcomes available (n=12)  
Outcome unavailable (n=3)  
Limited patient population (1);  
Maternity leave (1);  
Left clinical site (1)

**Analysis**

Final outcomes available (n=15)  
Outcomes unavailable (n=5)  
Limited patient population (3);  
Left clinical site (2)
